# Supplementary material for: Electrochemical Biosensor Employing Bi2S3 Nanocrystals-Modified Electrode for Bladder Cancer Biomarker Detection
Source: MDPI journal article supplement (doi:10.3390/chemosensors10020048), 2022-01-27
Supplement: s1 [file s1]

Archive with 1 entries (1 files):
- chemosensors-1544802-supplementary.pdf
