# Supplementary material for: Electrochemical Biosensor Employing Bi2S3 Nanocrystals-Modified Electrode for Bladder Cancer Biomarker Detection
Source: MDPI journal article supplement (doi:10.3390/chemosensors10020048), 2022-01-27
Supplement: s1 [file s1 › chemosensors-1544802-supplementary.pdf]

## **Supporting Information**

### **Electrochemical Biosensor Employing Bi<sub>2</sub>S<sub>3</sub> Nanocrystals-Modified Electrode for Bladder Cancer Biomarker Detection**

**Yunong Zhao <sup>1,†</sup>, Yanbing Tao <sup>1,†</sup>, Qing Huang <sup>1</sup>, Jing Huang <sup>1</sup>, Jiayu Kuang <sup>1</sup>, Ruiqin Gu <sup>1</sup>,**

**Pei Zeng <sup>2</sup>, Hua-Yao Li <sup>1</sup>, Huageng Liang <sup>2</sup> and Huan Liu <sup>1,\*</sup>**

\*Correspondence: huan@hust.edu.cn

† These authors contributed equally to this work.

The CV characterization of the bare and modified sensors was performed in the potential range from -0.6 to +0.8 V within the scan rates range of 25-200 mV s<sup>-1</sup>. The calculation of the effective surface areas ( $A_{\text{eff}}$ ) of bare and modified sensors was performed based on Randles-Sevcik equation:

$$I_p = 0.4463 \left( \frac{F^3}{RT} \right)^{1/2} A_{\text{eff}} n^{3/2} D^{1/2} c_0 v^{1/2}$$

where:  $I_p$  represents peak current (A),  $F$  represents Faraday constant ( $F = 96485 \text{ C mol}^{-1}$ ),  $R$  represents the gas constant ( $R = 8.314 \text{ J mol}^{-1} \text{ K}^{-1}$ ),  $A_{\text{eff}}$  represents the electrode surface area (cm<sup>2</sup>),  $n$  represents the number of electrons involved in the redox process ( $n = 1$  for  $[\text{Fe}(\text{CN})_6]^{3-/4-}$ ),  $T$  represents the temperature ( $T = 298.15 \text{ K}$ ),  $D$  represents diffusion coefficient ( $D = 7.2 \times 10^{-6} \text{ cm}^2 \text{ s}^{-1}$ ),  $c_0$  represents the concentration of  $[\text{Fe}(\text{CN})_6]^{3-/4-}$  ( $c_0 = 5 \text{ mmol L}^{-1}$ ), and  $v^{1/2}$  represents the square root of the scan rate ( $(\text{V s}^{-1})^{1/2}$ ).

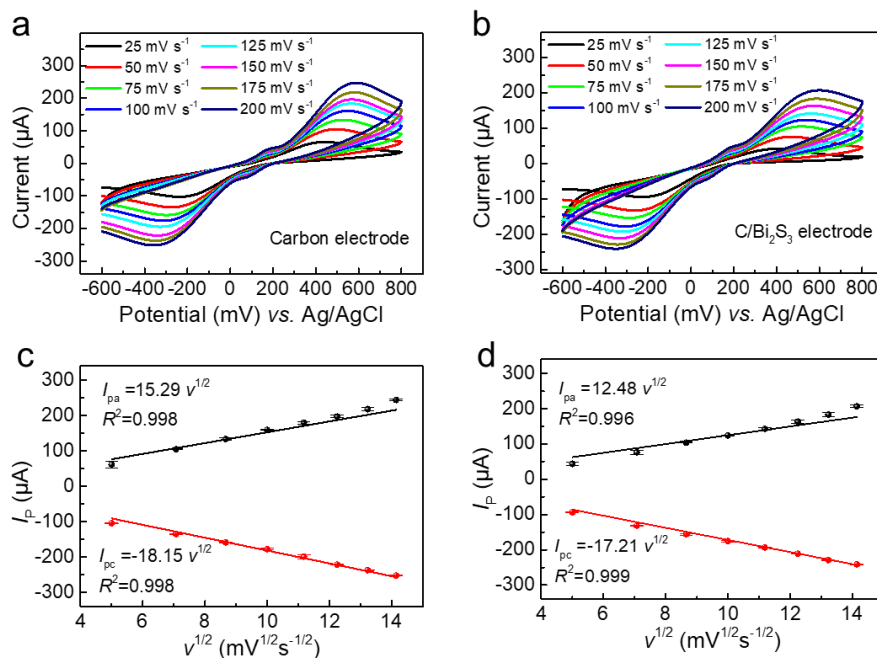

Figure S1. CV characterizations obtained for  $[\text{Fe}(\text{CN})_6]^{3-/4-}$  on the bare (a) and modified sensors (b) at the different scan rates within the range 25-200 mV s<sup>-1</sup>. the corresponding  $I_p$  vs.  $v^{1/2}$  plot for bare (c) and modified sensors (d).

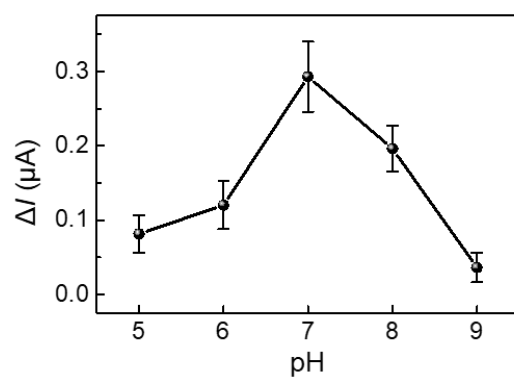

Figure S2. The effect of the pH on the recorded current signal.
